# Supplementary material for: Mutations in PIH proteins MOT48, TWI1 and PF13 define common and unique steps for preassembly of each, different ciliary dynein
Source: PubMed Central journal article supplement (PMC7608865; doi:10.1371/journal.pgen.1009126), 2020-11-03
Supplement: pgen.1009126.s006.pdf [file pgen.1009126.s006.pdf]

Supplemental Table 2. *Chlamydomonas* strains used in this study

| Strain Name                       | Responsible Protein/Description                               | Axonemal Defect                                                                           | Reference                 |
|-----------------------------------|---------------------------------------------------------------|-------------------------------------------------------------------------------------------|---------------------------|
| CC-124                            | N/A                                                           | Normal                                                                                    | [1]                       |
| CC-125                            | N/A                                                           | Normal                                                                                    | [1]                       |
| <i>cw15</i> (CC-4533)             | Likely cell-wall protein, regarded as wild-type in this study | Normal                                                                                    | [2, 3]                    |
| <i>fbf18</i>                      | FBB18                                                         | Defects in both ODA and IDAs                                                              | Manuscript in preparation |
| <i>ift46-1</i> (CC-4375)          | IFT46                                                         | Paralyzed short cilia, defects in ODA and central-pair                                    | [4, 5]                    |
| <i>ift74-1</i> (CC-5159)          | IFT74                                                         | Very short or no cilia                                                                    | [6]                       |
| <i>ift74-2</i> (CC-5161)          | IFT74                                                         | No cilia                                                                                  | [6]                       |
| <i>mot48-1 (ida10-1)</i>          | MOT48/IDA10                                                   | Slight defects in ODA, reduced amounts of some IDAs                                       | [7, 8]                    |
| <i>mot48-2 (ida10-2)</i>          | MOT48/IDA10; a new allele of <i>mot48</i>                     | Slight defects in ODA, reduced amounts of some IDAs                                       | This study, [9]           |
| <i>mot48-2; twi1-1</i>            | MOT48/IDA10 and TWI1; PIH double mutants                      | Slight defects in ODA, greatly reduced amounts of some IDAs, severer than <i>mot48-2</i>  | This study                |
| <i>mot48-2; twi1-1; TWI1::HA</i>  | <i>mot48-2; twi1-1</i> strain rescued with 3HA tagged TWI1    | Slight defects in ODA, reduced amounts of some IDAs, apparently similar to <i>mot48-2</i> | This study                |
| <i>mot48-2; pf13</i>              | MOT48/IDA10 and PF13; PIH double mutants                      | Very short or no cilia, dynein defect not analyzable                                      | This study                |
| <i>mot48-2; MOT48::HA</i>         | <i>mot48-2</i> strain rescued with 3HA tagged MOT48           | Not analyzed                                                                              | This study                |
| <i>mot48-2; MOT48::mCherry-HA</i> | <i>mot48-2</i> strain rescued with mCherry-3HA tagged MOT48   | Not analyzed                                                                              | This study                |
| <i>oda5</i> (CC-2236)             | ODA5                                                          | Lacking ODA                                                                               | [8, 10, 11]               |
| <i>oda7</i> (CC-2240)             | ODA7                                                          | Lacking ODA                                                                               | [8, 10, 12]               |
| <i>oda8</i> (CC-2242)             | ODA8                                                          | Lacking ODA                                                                               | [8, 10, 13]               |
| <i>oda10</i> (CC-2246)            | ODA10                                                         | Lacking ODA                                                                               | [10, 14]                  |
| <i>oda11</i> (CC-2672)            | ODA11/DHC13                                                   | Lacking HC $\alpha$ of ODA                                                                | [10, 15]                  |
| <i>oda16-1</i> (CC-4554)          | ODA16                                                         | Lacking ODA                                                                               | [8, 16]                   |

|                         |                                                                                                                                |                                                             |                 |
|-------------------------|--------------------------------------------------------------------------------------------------------------------------------|-------------------------------------------------------------|-----------------|
| <i>pf13</i>             | PF13                                                                                                                           | Greatly reduced ODA and reduced amounts of some IDAs        | [8, 17, 18]     |
| <i>pf13; twi1-1</i>     | PF13 and TWI1; PIH double mutants                                                                                              | Greatly reduced ODA and some IDAs, severer than <i>pf13</i> | This study      |
| <i>pf22</i> (CC-1382)   | PF22 and TWI1; found to have <i>twi1-2</i> background in this study                                                            | Lacking ODA and reduced amounts of some IDAs                | [17, 19]        |
| <i>pf22</i> (CC-2495)   | PF22                                                                                                                           | Lacking ODA and reduced amounts of some IDAs                | [8, 17, 19]     |
| <i>pf22A</i> (CC-2493)  | PF22                                                                                                                           | Lacking ODA and reduced amounts of some IDAs                | [8, 17, 19]     |
| <i>pf23</i> (CC-1383)   | PF23 and TWI1; found to have <i>twi1-2</i> background in this study                                                            | Slight defects in ODA, greatly reduced amounts of IDAs      | [17, 20]        |
| <i>pf23</i> (CC-3660)   | PF23 and TWI1; found to have <i>twi1-2</i> background in this study                                                            | Slight defects in ODA, greatly reduced amounts of IDAs      | [17, 20]        |
| <i>pf23</i> (5-4)       | PF23; parent strain used to map the <i>PF23/DYX1C1</i> locus and for part of the rescue experiments in our previous study [20] | Subtle defects in ODA, greatly reduced amounts of some IDAs | [17, 20]        |
| <i>twi1-1</i>           | TWI1; progeny from mating cross of wild-type (CC-125) and the LMJ.RY0402.076787 CLiP strain                                    | Slight defects in IDAs “c, e”                               | This study, [9] |
| <i>twi1-1; TWI1::HA</i> | <i>twi1-1</i> strain rescued with 3HA tagged TWI1                                                                              | Apparently normal                                           | This study      |

## References

1. Harris EH. The Chlamydomonas sourcebook: a comprehensive guide to biology and laboratory use: Academic Press, San Diego, 780pp; 1989.
2. Davies DR, Plaskitt A. Genetical and structural analyses of cell-wall formation in *Chlamydomonas reinhardi*. Genet Res. 1971;17(1):33-43.
3. Hyams J, Davies DR. The induction and characterisation of cell wall mutants of *Chlamydomonas reinhardi*. Mutat Res. 1972;14(4):381-89.
4. Lv B, Wan L, Taschner M, Cheng X, Lorentzen E, Huang K. Intraflagellar transport protein IFT52 recruits IFT46 to the basal body and flagella. J Cell Sci. 2017;130(9):1662-74.
5. Hou Y, Qin H, Follit JA, Pazour GJ, Rosenbaum JL, Witman GB. Functional analysis of an individual IFT protein: IFT46 is required for transport of outer dynein arms into flagella. J Cell Biol. 2007;176(5):653-65.
6. Brown JM, Cochran DA, Craige B, Kubo T, Witman GB. Assembly of IFT trains at

the ciliary base depends on IFT74. *Curr Biol.* 2015;25(12):1583-93.

7. Yamamoto R, Hirono M, Kamiya R. Discrete PIH proteins function in the cytoplasmic preassembly of different subsets of axonemal dyneins. *J Cell Biol.* 2010;190(1):65-71.
8. Hom EF, Witman GB, Harris EH, Dutcher SK, Kamiya R, Mitchell DR, et al. A unified taxonomy for ciliary dyneins. *Cytoskeleton (Hoboken).* 2011;68(10):555-65.
9. Li X, Zhang R, Patena W, Gang SS, Blum SR, Ivanova N, et al. An indexed, mapped mutant library enables reverse genetics studies of biological processes in *Chlamydomonas reinhardtii*. *Plant Cell.* 2016;28(2):367-87.
10. Kamiya R. Mutations at twelve independent loci result in absence of outer dynein arms in *Chlamydomonas reinhardtii*. *J Cell Biol.* 1988;107(6):2253-8.
11. Wirschell M, Pazour G, Yoda A, Hirono M, Kamiya R, Witman GB. Oda5p, a novel axonemal protein required for assembly of the outer dynein arm and an associated adenylate kinase. *Mol Biol Cell.* 2004;15(6):2729-41.
12. Freshour J, Yokoyama R, Mitchell DR. *Chlamydomonas* flagellar outer row dynein assembly protein ODA7 interacts with both outer row and I1 inner row dyneins. *J Biol Chem.* 2007;282(8):5404-12.
13. Desai PB, Freshour JR, Mitchell DR. *Chlamydomonas* axonemal dynein assembly locus ODA8 encodes a conserved flagellar protein needed for cytoplasmic maturation of outer dynein arm complexes. *Cytoskeleton (Hoboken).* 2015;72(1):16-28.
14. Dean AB, Mitchell DR. *Chlamydomonas* ODA10 is a conserved axonemal protein that plays a unique role in outer dynein arm assembly. *Mol Biol Cell.* 2013;24(23):3689-96.
15. Sakakibara H, Mitchell DR, Kamiya R. A *Chlamydomonas* outer arm dynein mutant missing the alpha heavy chain. *J Cell Biol.* 1991;113(3):615-22.
16. Ahmed NT, Mitchell DR. ODA16p, a *Chlamydomonas* flagellar protein needed for dynein assembly. *Mol Biol Cell.* 2005;16(10):5004-12.
17. Huang B, Piperno G, Luck DJ. Paralyzed flagella mutants of *Chlamydomonas reinhardtii*. Defective for axonemal doublet microtubule arms. *J Biol Chem.* 1979;254(8):3091-9.
18. Omran H, Kobayashi D, Olbrich H, Tsukahara T, Loges NT, Hagiwara H, et al. Ktu/PF13 is required for cytoplasmic pre-assembly of axonemal dyneins. *Nature.* 2008;456(7222):611-16.
19. Mitchison HM, Schmidts M, Loges NT, Freshour J, Dritsoula A, Hirst RA, et al. Mutations in axonemal dynein assembly factor DNAAF3 cause primary ciliary dyskinesia. *Nat Genet.* 2012;44(4):381-9, s1-2.
20. Yamamoto R, Obbineni JM, Alford LM, Ide T, Owa M, Hwang J, et al. *Chlamydomonas* DYX1C1/PF23 is essential for axonemal assembly and proper morphology of inner dynein arms. *PLoS Genet.* 2017;13(9):e1006996.
